# Supplementary material for: On the Role of ZrN Particles in the Microstructural Development in a Beta Titanium Alloy Processed by Laser Powder Bed Fusion
Source: MDPI journal article supplement (doi:10.3390/mi15010104), 2024-01-05
Supplement: s1 [file s1]

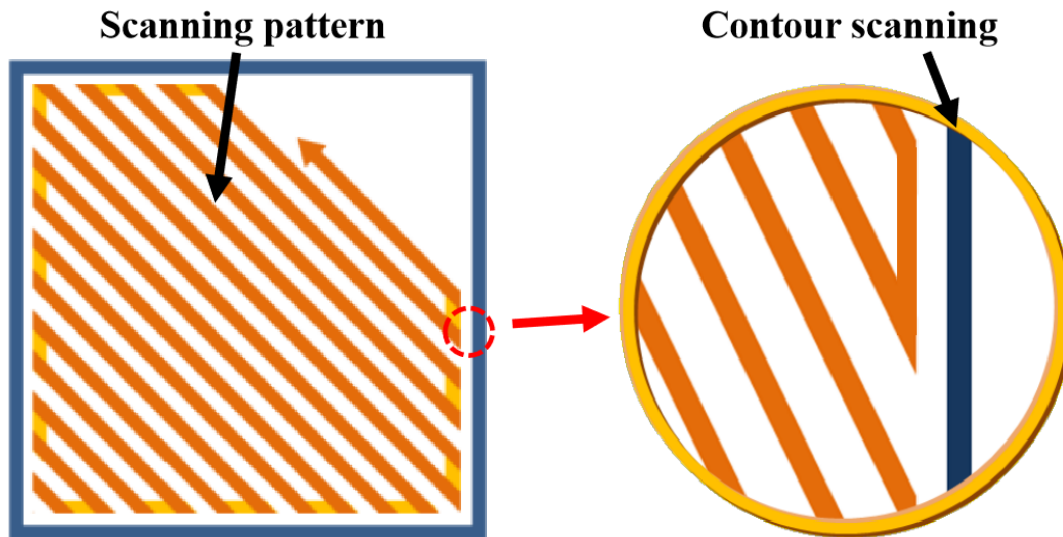

**Supplementary Figure S1.** Schematics showing the hatch scanning strategy and contour scanning (yellow lines) used in the present study.

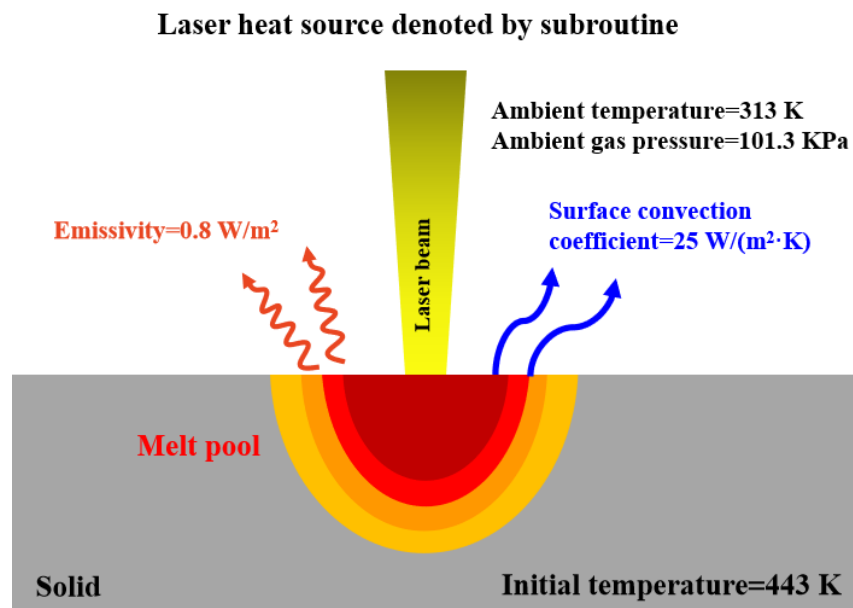

**Supplementary Figure S2.** Schematic showing the boundary conditions set in the simulation model of a melt pool.
